# Supplementary material for: Regulation of Gene Expression by PI3K in Mouse Growth Plate Chondrocytes
Source: PLoS One. 2010 Jan 25;5(1):e8866. doi: 10.1371/journal.pone.0008866 (PMC2810323; doi:10.1371/journal.pone.0008866)
Supplement: Table S4 — Genes found in the intersection of 1.4-fold change ILY and C2 enriched in DMSO (0.03 MB XLS) [file pone.0008866.s005.xls]

## Sheet: Sheet1
Table S3 A. Genes found in the intersection of 1.4-fold change I<II and 1.4-fold change D>LY and C2 enriched in DMSO
	Column A		Column B
C2 category	Gene names- Intersection C2 with 1.4 D>LY reliable signal	Fold change	Gene names- intersection C2 with 1.4 D>LY and 1.4 I<II reliable signal	Fold change
ARGININE_AND_PROLINE_METABOLISM	Ass1	3.456
	Agmat	1.62
	Aldh9a1	1.524
BCNU_GLIOMA_NOMGMT_48HRS_UP	Sncg	2.695
BILE_ACID_BIOSYNTHESIS	Adh7	3.36
	Aldh9a1	1.524
CARIES_PULP_HIGH_UP	Lcp1	2.448	Lcp1	2.448
	Nnmt	2.14	F13a1	2.122
	F13a1	2.122
	Anpep	1.869
	Pla2g7	1.631
	Cd53	1.598
CHAUVIN_ANDROGEN_REGULATED_GENES	Ramp3	2.194	Tcf7	1.962
	Tcf7	1.962	Isg20	1.867
	Isg20	1.867	Fdps	1.719
	Cyb561	1.861
	Enpp1	1.79
	Fdps	1.719
	Pemt	1.659
CHOLESTEROL_BIOSYNTHESIS	Nsdhl	1.745	Nsdhl	1.745
	Fdps	1.719	Fdps	1.719
	Lss	1.606	Lss	1.606
	Pmvk	1.435	Pmvk	1.435
	Idi1	1.417	Idi1	1.417
CTLA4PATHWAY	Cd247	4.165
	Lck	2.401
DCPATHWAY	Anpep	1.869
	Tlr9	1.559
EICOSANOID SYNTHESIS	Ptgs1	1.644
	Dpep1	1.518
GH_EXOGENOUS_MIDDLE_UP	Selp	2.39	Tcf7	1.962
	Tcf7	1.962	Pctk3	1.522
	Gng3	1.829
	Zeb2	1.676
	Camk2a	1.627
	Pctk3	1.522
GLUCONEOGENESIS	Adh7	3.36
	Eno3	1.597
	Aldh9a1	1.524
	Bpgm	1.487
GLYCINE_SERINE_AND_THREONINE_METABOLISM	Shmt1	2.012	Pemt	1.659
	Pemt	1.659
	Gcat	1.543
	Plcg2	1.454
GLYCOLYSIS	Adh7	3.36
	Eno3	1.597
	Aldh9a1	1.524
	Bpgm	1.487
GOLDRATH_CYTOLYTIC	Perp	1.796	Perp	1.796
	Ly6c	1.777
	Casp3	1.586
GPCRDB_CLASS_A_RHODOPSIN_LIKE	Ednrb	3.781	Gpr30	2.163
	Avpr2	2.4
	Gpr30	2.163
	F2rl2	1.772
	Ptgir	1.52
GPCRS_CLASS_A_RHODOPSIN_LIKE	Ednrb	3.781	Gpr30	2.163
	Avpr2	2.4
	Gpr30	2.163
	F2rl2	1.772
	Ptgir	1.52
HISTIDINE_METABOLISM	Aldh9a1	1.524
HUMAN_TISSUE_PLACENTA	Phlda2	8.481	Phlda2	8.481
	Pdpn	1.417
IFNA_HCMV_6HRS_UP	Ifit3	2.527	Isg20	1.867
	Tlr3	2.017	Pscd1	1.832
	Isg20	1.867	Gmpr	1.599
	Il15ra	1.857
	Pscd1	1.832
	Gmpr	1.599
IGF_VS_PDGF_UP	Tnnc2	2.141
	Ppfia4	1.961
	Tnnt1	1.932
	Atp2a1	1.863
	Tnnt2	1.838
	Mybph	1.747
	Myh3	1.718
	Actn3	1.688
	Sdpr	1.678
	Tnnc1	1.551
	Myog	1.458
	Mylpf	1.432
LAL_KO_3MO_UP	Apobec1	2.803	Acp5	2.17
	Acp5	2.17
	Slc11a1	1.905
	Cd68	1.836
	Pla2g7	1.631
	Gdf15	1.59
LAL_KO_6MO_UP	Apobec1	2.803	Acp5	2.17
	Adam8	2.243
	Acp5	2.17
	Galc	2.152
	Slc11a1	1.905
	Cd68	1.836
	Pla2g7	1.631
	Gdf15	1.59
	Kif1a	1.547
MYOD_BRG1_UP	Tnnc2	2.141
	Ppfia4	1.961
	Atp2a1	1.863
	Igfbp5	1.855
	Tnnt2	1.838
	Mybph	1.747
	Myl1	1.722
	Myh3	1.718
	Eno3	1.597
	Myog	1.458
	Mylpf	1.432
	Dysf	1.4
NAKAJIMA_MCSMBP_MAST	Phlda2	8.481	Phlda2	8.481
	Gdf15	1.59	Lgals3	1.525
	Lgals3	1.525
PEPTIDE_GPCRS	Ednrb	3.781
	Avpr2	2.4
SANA_IFNG_ENDOTHELIAL_UP	Cxcl10	2.554	Cxcl10	2.554
	Kcnh2	1.765
	Cx3cl1	1.501
STOSSI_ER_UP	F13a1	2.122	F13a1	2.122
	Itga6	1.897	Skil	1.805
	Sparcl1	1.85
	Cd34	1.843
	Skil	1.805
STRIATED_MUSCLE_CONTRACTION	Actn2	4.468
	Tnnc2	2.141
	Tnnt1	1.932
	Tnnt2	1.838
	Des	1.773
	Myl1	1.722
	Myh3	1.718
	Actn3	1.688
